# Supplementary material
Source: HighWire-hosted journal article supplement (https://sit.bmj.com/highwire/filestream/539/field_highwire_adjunct_files/2/bmjsit-2022-000156supp003_data_supplement.pdf)
Supplement: bmjsit-2022-000156supp003_data_supplement.pdf [file bmjsit-2022-000156supp003_data_supplement.pdf]

Supplementary Table 3: Lung segmentation

| Ref. No. | Author    | Country     | Journal                        | Year | Study design  | Patient selection                                                            |                                                                                | Imaging techniques |                                                                                                                     |                                                                                                 |                                                                                                                                      |                                                                               | Endpoint measures        |                                                                                                                                                   |                                                                                        | Adverse effects                                                                                                                                                                                                                                                  | Learning curve                                                                                                                                                                                                                        | Cost analysis | Other comments | Ref. detail |                                                                                                                                                                               |                                                                                                          |
|----------|-----------|-------------|--------------------------------|------|---------------|------------------------------------------------------------------------------|--------------------------------------------------------------------------------|--------------------|---------------------------------------------------------------------------------------------------------------------|-------------------------------------------------------------------------------------------------|--------------------------------------------------------------------------------------------------------------------------------------|-------------------------------------------------------------------------------|--------------------------|---------------------------------------------------------------------------------------------------------------------------------------------------|----------------------------------------------------------------------------------------|------------------------------------------------------------------------------------------------------------------------------------------------------------------------------------------------------------------------------------------------------------------|---------------------------------------------------------------------------------------------------------------------------------------------------------------------------------------------------------------------------------------|---------------|----------------|-------------|-------------------------------------------------------------------------------------------------------------------------------------------------------------------------------|----------------------------------------------------------------------------------------------------------|
|          |           |             |                                |      |               | Subject                                                                      | N (cases)                                                                      | Fluorogenic agent  | Dose                                                                                                                | Route                                                                                           | Timing                                                                                                                               | Imaging system                                                                | Quantitative measurement | Main endpoints                                                                                                                                    | Imaging accuracy/success rate                                                          |                                                                                                                                                                                                                                                                  |                                                                                                                                                                                                                                       |               |                |             | Clinical impact, changes in intraoperative decision-making and outcomes                                                                                                       | Clinical impact advantages in postoperative outcomes                                                     |
| 1        | Miaki     | Japan       | J Thorac Cardiovasc Surg       | 2010 | Case series   | Lung tumours                                                                 | 8                                                                              | ICG                | 3.0 mg/kg                                                                                                           | IV                                                                                              | After division of the dominant pulmonary artery of the target segment                                                                | Olympus (CLV-2065L)                                                           | NA                       | Visualization of lung segments                                                                                                                    | 100%                                                                                   | NA                                                                                                                                                                                                                                                               | NA                                                                                                                                                                                                                                    | None          | NA             | NA          | Minimum staining intensity was attained 28 seconds after dye injection, and the observation duration was 3.5                                                                  | Miaki N, Chang SS, Igarashi M, et al. Eur J Cardiothorac Surg. 2010 Oct;48(4):752-4                      |
| 2        | Sekine    | Japan       | J Thorac Cardiovasc Surg       | 2012 | Prospective   | Lung cancer                                                                  | 10 (+19 control)                                                               | ICG                | 10-15mg                                                                                                             | Transbronchial injection                                                                        | After induction of general anaesthesia                                                                                               | Olympus (prototype)                                                           | NA                       | Visualization of intersegmental planes                                                                                                            | 100%                                                                                   | NA                                                                                                                                                                                                                                                               | Length of stay was shorter in the ICG than in the control group (P = .05).                                                                                                                                                            | None          | NA             | NA          | Compared with traditional lobectomy without fluorescence images. Staining duration was longer in the 1-wavelength method. Image clarity was better in the 2-wavelength method | Sekine Y, Ko E, Oishi H, Minami M. J Thorac Cardiovasc Surg. 2012 Jun;143(6):1330-5                      |
| 3        | Kasai     | Japan       | Eur J Cardiothorac Surg        | 2013 | Prospective   | Segmentectomy                                                                | 30                                                                             | ICG                | 3 mg/kg (2-wavelength method) and 0.5 mg/kg (1-wavelength method)                                                   | IV                                                                                              | After ligation of the major artery and bronchus of the resecting segment                                                             | Infrared thoracoscope                                                         | NA                       | Identify lung intersegmental borders and complete efficacy with two-wavelength imaging versus one-wavelength method                               | 90% success rate (2-wavelength method) and 19 out of 20 patients (1-wavelength method) | NA                                                                                                                                                                                                                                                               | NA                                                                                                                                                                                                                                    | None          | NA             | NA          | Kasai Y, Terami S, Chang SS, Miaki N, Enoki M, Goto T, et al. Eur J Cardiothorac Surg. 2013 Dec;44(6):1108-7                                                                  |                                                                                                          |
| 4        | Pardolosi | Italy       | J Thorac Cardiovasc Surg       | 2014 | Case series   | Robotic anatomic segmentectomy                                               | 2                                                                              | ICG                | 2.5 mg in 10 mL                                                                                                     | IV                                                                                              | After division of the target segment bronchus, vein, and artery                                                                      | Not stated                                                                    | NA                       | Identify the intersegmental plane                                                                                                                 | 100%                                                                                   | NA                                                                                                                                                                                                                                                               | No complications                                                                                                                                                                                                                      | None          | NA             | NA          | Pardolosi A, Varnesi G, Soffi P, Spaggiari L. J Thorac Cardiovasc Surg. 2014 Apr;142(4):717-24                                                                                |                                                                                                          |
| 5        | Tarumi    | Japan       | Eur J Cardiothorac Surg        | 2014 | Prospective   | Video-assisted thoracoscopic segmentectomy                                   | 13                                                                             | ICG                | 3 mg/kg in 11 patients, 0.5 mg/kg in 2 patients as a trial dose                                                     | IV                                                                                              | After interrupting the dominant arteries                                                                                             | Infrared thoracoscope (IRT, Olympus)                                          | NA                       | Reveal the intersegmental line by blood flow difference                                                                                           | 85% success rate                                                                       | NA                                                                                                                                                                                                                                                               | 2 cases of pulmonary fistula                                                                                                                                                                                                          | None          | NA             | NA          | Tarumi S, Miaki N, Kasai Y, Chang SS, Gao T, Kamehira H, Fur J. Cardiothorac Surg. 2014 Jul;44(1):17-5                                                                        |                                                                                                          |
| 6        | Konoda    | Japan       | J Thorac Dis                   | 2016 | Consecutive   | Thoracoscopic anatomical segmentectomy                                       | 12                                                                             | ICG                | The authors state "2 mL body"                                                                                       | IV                                                                                              | When forming the segmental plane                                                                                                     | Karl Storz                                                                    | NA                       | Identify the segmental plane                                                                                                                      | Not reported                                                                           | NA                                                                                                                                                                                                                                                               | Minor air leak                                                                                                                                                                                                                        | None          | NA             | NA          | Ligasure may reduce the cost of the staple retractor                                                                                                                          | Konoda H, Dejima H, Mizuno T, Sakakura N, Sakai Y. J Thorac Dis. 2016 Jun;6(1):114-6                     |
| 7        | Iizuka    | Japan       | J Thorac Dis                   | 2016 | Prospective   | Thoracoscopic anatomical segmentectomy (caldor resection)                    | 71                                                                             | ICG                | 5 mg/kg                                                                                                             | IV                                                                                              | Unclear from the text                                                                                                                | Karl Storz                                                                    | NA                       | Determine factors predicting ICG visualization during the type of procedure                                                                       | 98.60%                                                                                 | NA                                                                                                                                                                                                                                                               | NA                                                                                                                                                                                                                                    | None          | NA             | NA          | Visibility may be obscured in patients who were heavy smokers or have a low attenuation rate                                                                                  | Iizuka S, Kuroda H, Yoshimura K, Dejima H, Saito K, Nozomi A, et al. J Thorac Dis. 2016 May;6(5):95-91   |
| 8        | Ito       | Japan       | Eur J Cardiothorac Surg        | 2017 | Case report   | Thoracoscopic anatomical segmentectomy                                       | 1                                                                              | ICG                | 5 mg                                                                                                                | IV                                                                                              | After ligation of the target segmental vein, artery, and bronchus; after injection, the pulmonary vein is clamped to delay resection | Not reported                                                                  | NA                       | Identify the intersegmental plane but delay the induction of ICG to increase visualization time                                                   | 100%                                                                                   | NA                                                                                                                                                                                                                                                               | NA                                                                                                                                                                                                                                    | None          | NA             | NA          | Ito A, Takai M, Shimamoto A, Shimizu H. Eur J Cardiothorac Surg. 2017 Dec;52(6):1228-1229                                                                                     |                                                                                                          |
| 9        | Yamashiki | Japan       | Ann Thorac Surg                | 2017 | Case report   | Thoracoscopic basal segmentectomy                                            | 1                                                                              | ICG                | 5 mg/kg                                                                                                             | IV                                                                                              | After transecting the V9-10 area                                                                                                     | Stoyker (Novadaq)                                                             | NA                       | Identify the intersegmental plane                                                                                                                 | 100% success rate                                                                      | NA                                                                                                                                                                                                                                                               | NA                                                                                                                                                                                                                                    | None          | NA             | NA          | Yamashiki K, Okamoto N, Onishi Y, Matsui T. Ann Thorac Surg. 2017 Nov;104(5):1647-1649                                                                                        |                                                                                                          |
| 10       | Günard    | Switzerland | Interact Cardiovasc Thorac Ann | 2017 | Retrospective | Segmentectomy by video-assisted thoracoscopic surgery                        | 22                                                                             | ICG                | 2.5 mg/mL in 5 mL                                                                                                   | IV                                                                                              | After ligation of arterial branches                                                                                                  | FNPOINT                                                                       | NA                       | Identify the intersegmental plane                                                                                                                 | 100%                                                                                   | In 3 patients, ICG imaging prevented incomplete resection or devascularization                                                                                                                                                                                   | 2 patients experienced prolonged air leak with pneumonias, 1 patient experienced prolonged air leak, and 1 patient experienced colonic fistula; no one required chest drainage or rehospitalization                                   | None          | NA             | NA          | Günard S, Tognazzo F, Beldi G, Vaidyanathan A, Lisaks M, Karimovic W. Interact Cardiovasc Thorac Ann. 2017 Nov;17(5):281-284                                                  |                                                                                                          |
| 11       | Mao       | Japan       | J Via Surg                     | 2017 | Prospective   | Thoracoscopic anatomical segmentectomy                                       | 20 (15 primary lung cancer and five metastatic lung tumours)                   | ICG                | 0.25 mg/kg                                                                                                          | IV                                                                                              | After ligating the target artery and bronchus                                                                                        | Karl Storz                                                                    | NA                       | Define the intersegmental plane                                                                                                                   | 95% success rate                                                                       | NA                                                                                                                                                                                                                                                               | Slight renal dysfunction in one patient                                                                                                                                                                                               | None          | NA             | NA          | Mao M, Okamura S, Nakao M, Minami Y, Nakagawa K. J Via Surg. 2017 Jan;7:5-8                                                                                                   |                                                                                                          |
| 12       | Mao       | China       | J Biomed Opt                   | 2017 | Case series   | Validate use of the thoracoscope in lung cancer patients                     | 3                                                                              | ICG                | 0.4 mg/kg                                                                                                           | IV                                                                                              | After ligation of the segmental pulmonary arteries                                                                                   | Non-infrared thoracoscope developed by the authors                            | NA                       | Define the intersegmental plane                                                                                                                   | 100% success rate                                                                      | NA                                                                                                                                                                                                                                                               | NA                                                                                                                                                                                                                                    | None          | NA             | NA          | Mao Y, Wang K, He K, Ye J, Yang F, Zhou J, et al. J Biomed Opt. 2017 Jan;12(2):04602                                                                                          |                                                                                                          |
| 13       | Hsieh     | Taiwan      | Surg Endosc                    | 2017 | Case report   | Robotic segmentectomy                                                        | 1                                                                              | ICG                | NA                                                                                                                  | IV                                                                                              | Not stated (this document is the abstract to a video)                                                                                | Not stated (this document is the abstract to a video)                         | NA                       | Visualize the intersegmental plane                                                                                                                | 100% success rate                                                                      | NA                                                                                                                                                                                                                                                               | NA                                                                                                                                                                                                                                    | None          | NA             | NA          | Hsieh CP, Liu WH, Wu YC, Hsieh MI, Chao YK. Surg Endosc. 2017 Aug;31(8):3347-3348                                                                                             |                                                                                                          |
| 14       | Pischik   | Russia      | J Thorac Dis                   | 2018 | Prospective   | Video-assisted thoracic lung resection                                       | 86 (90 segmentectomies)                                                        | ICG                | 0.15 mg/kg (more was added when necessary)                                                                          | IV                                                                                              | After division of the target vascular and bronchial branches                                                                         | Karl Storz                                                                    | NA                       | Identify the intersegmental plane                                                                                                                 | 100%                                                                                   | Widened-field borders were observed in 86 of the 90 procedures. ICG highlighted technical problems in the other 4 cases (artery mis-clearing, artery mis-closing, weak fluorescence in a patient with severe emphysema, and the presence of multiple metastases) | 19 patients experienced air leaks, 1 patient developed pneumonia, and 2 patients experienced atrial fibrillation                                                                                                                      | None          | NA             | NA          | ICG reduces the duration of ICG staining                                                                                                                                      | Pischik VG, Korolevskiy A. J Thorac Dis. 2018 Nov;8(18):3171-3174                                        |
| 15       | Zhang     | China       | J Thorac Dis                   | 2018 | Case report   | Unilateral video-assisted thoracic SS segmentectomy and S1a subsegmentectomy | 1                                                                              | ICG                | 2.5 mg/mL in 1 mL saline                                                                                            | IV                                                                                              | After transection of the bronchus                                                                                                    | Infrared thoracoscope (no more details)                                       | NA                       | Identify the intersegmental plane                                                                                                                 | 100% success rate                                                                      | NA                                                                                                                                                                                                                                                               | NA                                                                                                                                                                                                                                    | None          | NA             | NA          | Zhang G, Yu Z, Wang L, Shen G, Chao Y. J Thorac Dis. 2018 Jul;10(7):1475-1480                                                                                                 |                                                                                                          |
| 16       | Meacci    | Italy       | J Via Surg                     | 2018 | Case series   | Unilateral video-assisted thoracic lung segmentectomy                        | 2                                                                              | ICG                | 2.5 mg in 10 mL                                                                                                     | IV                                                                                              | After ligation of the segmental artery                                                                                               | Not reported                                                                  | NA                       | Identify the intersegmental plane                                                                                                                 | 100% success rate                                                                      | NA                                                                                                                                                                                                                                                               | NA                                                                                                                                                                                                                                    | None          | NA             | NA          | Meacci E, Nardoni D, Congioli MT, Chiappetta M, Petrucci C, Caravella L, Margonato S. J Via Surg. 2018 Jan;8:1-4                                                              |                                                                                                          |
| 17       | Elkhouly  | Italy       | Asian Cardiovasc Thorac Ann    | 2018 | Case series   | Thoracoscopic anatomical segmentectomy                                       | 2                                                                              | ICG                | 30 mL of 10% saline-diluted ICG                                                                                     | Injection into the visible bronchi                                                              | After interruption of the bronchi targeted for resection                                                                             | Not reported                                                                  | NA                       | Identify the intersegmental plane                                                                                                                 | 100% success rate                                                                      | NA                                                                                                                                                                                                                                                               | NA                                                                                                                                                                                                                                    | None          | NA             | NA          | The cost of the imaging system is discussed and considered -----                                                                                                              | Elkhouly AG, Cristini B, Pompeo E, Asano Cardiovasc Thorac Ann. 2018 Mar;26(3):247-249                   |
| 18       | Sun       | China       | Thorac Cancer                  | 2019 | Retrospective | Lung segmentectomy                                                           | 19                                                                             | ICG                | 2 mL of 25 mg/10 mL                                                                                                 | IV                                                                                              | After transecting the target segment structures                                                                                      | FNPOINT                                                                       | NA                       | Identify the intersegmental plane                                                                                                                 | 100% success rate                                                                      | NA                                                                                                                                                                                                                                                               | 3 patients experienced complications                                                                                                                                                                                                  | None          | NA             | NA          | Sun Y, Zhang Q, Wang Z, Shao F, Yang R. Thorac Cancer. 2019 Oct;10(10):2031-2031                                                                                              |                                                                                                          |
| 19       | Nakanishi | Japan       | Thorac Cancer                  | 2019 | Case report   | Thoracoscopic lobectomy                                                      | 1                                                                              | ICG                | NA                                                                                                                  | IV                                                                                              | After transection of the arteries                                                                                                    | Not reported                                                                  | NA                       | Detect the interlobar fissure boundary                                                                                                            | Apparently successful                                                                  | NA                                                                                                                                                                                                                                                               | NA                                                                                                                                                                                                                                    | None          | NA             | NA          | Nakanishi K, Kuroda H, Nakada T, Ueno H, Sakakura N. Thorac Cancer. 2019 Jul;10(7):1054-1056                                                                                  |                                                                                                          |
| 20       | Chao      | Taiwan      | Surg Endosc                    | 2019 | Retrospective | Video-assisted thoracoscopic lung resection                                  | 11                                                                             | ICG                | 0.3-0.5 mL at 0.125 mg/mL                                                                                           | IV                                                                                              | After inserting a needle into the thorax                                                                                             | FNPOINT                                                                       | NA                       | Identify the lesions                                                                                                                              | 100% success rate                                                                      | NA                                                                                                                                                                                                                                                               | NA                                                                                                                                                                                                                                    | None          | NA             | NA          | Chao YK, Leow QKY, Wen CT, Fang HY. Surg Endosc. 2019 Nov;33(11):3388-3393                                                                                                    |                                                                                                          |
| 21       | Jin       | China       | Surg Innov                     | 2019 | Retrospective | Video-assisted thoracoscopic anatomical segmentectomy                        | 21                                                                             | ICG                | 0.5 mg/kg                                                                                                           | IV                                                                                              | After ligation and transection of the segmental artery                                                                               | Not reported                                                                  | NA                       | Visualize the segmental fissure                                                                                                                   | Not reported                                                                           | NA                                                                                                                                                                                                                                                               | 2 patients developed pneumonias, 3 patients developed arrhythmias, and 1 patient experienced prolonged air leak                                                                                                                       | None          | NA             | NA          | Jin Y, Wang M, Xie L, Zhao X. Surg Innov. 2019 Jun;24(4):474-477                                                                                                              |                                                                                                          |
| 22       | Genici    | US          | Ann Thorac Surg                | 2019 | Retrospective | Robotic segmentectomy                                                        | 245 (all 245 received IV ICG, but only 93 also received ICG bronchoscopically) | ICG                | 25 mg dissolved in 10 mL of that quantity, 0.5 mL was administered bronchoscopically and the remaining 0.5 mL ----- | Bronchoscopically in some cases and then intravenously in all cases given after artery ligation | The intravenous dose was given after artery ligation                                                                                 | The authors only say "fluorescence" which is the software, not the instrument | NA                       | Compare effectiveness of delineation of the intersegmental plane with bronchoscopy with ICG correctly identified the lesion in 80 of the 89 ----- | 100% success rate in delineation of the intersegmental plane                           | NA                                                                                                                                                                                                                                                               | 2 patients developed postoperative pneumonias; 1 patient had a stroke; there were no mortalities up to 90 days after surgery; postoperative complications occurred in 60 patients (24.5%); typically air leak and atrial fibrillation | None          | NA             | NA          | Genici TC, Fornaciari L, Kent A, Mihaljak G, Zerova M, Pass HI, et al. Ann Thorac Surg. 2019 Aug;108(2):363-369                                                               |                                                                                                          |
| 23       | Yajima    | Japan       | Ann Thorac Surg                | 2019 | Prospective   | Upper lobe thoracoscopic segmentectomy                                       | 16                                                                             | ICG                | 0.5 mg/kg                                                                                                           | IV                                                                                              | After isolation of the target segment artery and bronchus                                                                            | Infrared thoracoscope (Olympus)                                               | NA                       | Identify the intersegmental border                                                                                                                | 75%                                                                                    | NA                                                                                                                                                                                                                                                               | None reported                                                                                                                                                                                                                         | None          | NA             | NA          | Temporary compression of the interlobar pulmonary artery improves visualization with -----                                                                                    | Yajima T, Shimizu K, Mugi A, Ito T, Otsuki Y, Ohyoshi K, et al. Ann Thorac Surg. 2019 Aug;108(2):444-445 |

|    |           |                |                                |      |               |                                                       |                                                      |     |                                                                                   |                                                                              |                                                                                      |                                                           |    |                                                                            |                                                                                  |                                                                                                                                   |                                                                                                                                                                             |                                   |      |                                                                        |                                                                                                                          |                                                                                                        |
|----|-----------|----------------|--------------------------------|------|---------------|-------------------------------------------------------|------------------------------------------------------|-----|-----------------------------------------------------------------------------------|------------------------------------------------------------------------------|--------------------------------------------------------------------------------------|-----------------------------------------------------------|----|----------------------------------------------------------------------------|----------------------------------------------------------------------------------|-----------------------------------------------------------------------------------------------------------------------------------|-----------------------------------------------------------------------------------------------------------------------------------------------------------------------------|-----------------------------------|------|------------------------------------------------------------------------|--------------------------------------------------------------------------------------------------------------------------|--------------------------------------------------------------------------------------------------------|
| 24 | Motono    | Japan          | J Thorac Dis                   | 2019 | Prospective   | Video-assisted thoracic segmentectomy                 | 20                                                   | ICG | 5 mg                                                                              | IV                                                                           | After ligating the target arteries, veins, and bronchi                               | Karl Storz                                                | NA | Visualize the demarcation line                                             | 90%                                                                              | NA                                                                                                                                | 5 of the 20 patients experienced complications (air leak that required pleurodesis)                                                                                         | None                              | NA   | NA                                                                     | Motono N, Imai S, Yamashita A, Sakuma A, Ueda K, Uemoto H. J Thorac Dis. 2019;Mar;11(1):702-707                          |                                                                                                        |
| 25 | Zhang     | China          | Thoracic Cancer                | 2019 | Not stated    | Sublobar resection                                    | 46 (35 for wedge resection and 11 for segmentectomy) | ICG | 10-12.5 mg (IV) 0.25-0.5mg (percutaneous injection)                               | Percutaneous injection (wedge resection) and IV (segmentectomy)              | Preoperatively (wedge resection) and during surgery before resection (segmentectomy) | None-defined bronchoscope (no other kinds given)          | NA | Locate pulmonary nodules                                                   | In 2 wedge resection patients, ICG failed to locate the nodules                  | NA                                                                                                                                | No adverse postoperative events                                                                                                                                             | None                              | NA   | NA                                                                     | Zhang T, Ma Q, Dong S, et al. Thoracic Cancer. 2019 Jun;10(4):2410                                                       |                                                                                                        |
| 26 | Chen      | China          | Surg Innov                     | 2019 | Prospective   | Video-assisted pulmonary segmentectomy                | 19                                                   | ICG | 25 mg                                                                             | IV                                                                           | After ligation of dominant arteries                                                  | PINPOINT                                                  | NA | Identify the intersegmental plane                                          | 100%                                                                             | NA                                                                                                                                | Postoperative air leak in 2 patients                                                                                                                                        | None                              | NA   | NA                                                                     | Chen R, Ma Y, Li C, Li Y, Yang B, Guo J, et al. Surg Innov. 2019 Jun;20(3):337-341                                       |                                                                                                        |
| 27 | Méhta     | Canada         | J Thorac Cardiovasc Surg       | 2019 | Prospective   | Robotic segmentectomy                                 | 31                                                   | ICG | 15-20 mg                                                                          | IV                                                                           | After ligation of the segmental artery, vein, and bronchus                           | da Vinci Si                                               | NA | Compare the predicted and true intersegmental plane                        | 100% phase                                                                       | ICG mapping showed that in 74% of cases, the true intersegmental plane was different from the intersegmental plane predicted by 2 | 10 out of 33 patients experienced air leaks or atial fillulation                                                                                                            | None                              | NA   | NA                                                                     | Méhta M, Patel YS, Yanoaka K, Waddell TK, Shangri Y, Fahim C, et al. J Thorac Cardiovasc Surg. 2019 May;157(5):2029-2035 |                                                                                                        |
| 28 | Sekine    | Japan          | Semin Thorac Cardiovasc Surg   | 2019 | Prospective   | Pulmonary sublobar resection                          | 58                                                   | ICG | 25 mg in 10 mL                                                                    | Transbronchial instillation                                                  | After inflation of a balloon catheter                                                | PINPOINT                                                  | NA | Assess border clarity under ICG and compare with predicted location        | 89.2%                                                                            | NA                                                                                                                                | None reported                                                                                                                                                               | None                              | NA   | NA                                                                     | All procedures performed by one surgeon (the first author)                                                               |                                                                                                        |
| 29 | Cin       | Czech Republic | Ann Transl Med                 | 2019 | Case report   | Pulmonary segmentectomy (non-lobarized)               | 1                                                    | ICG | 0.1 mg/kg                                                                         | Not reported                                                                 | After cutting the segmental artery                                                   | PINPOINT                                                  | NA | Identify the resection line                                                | Clear borders were not detected (presumably because of low concentration of ICG) | None reported                                                                                                                     | None                                                                                                                                                                        | NA                                | NA   | Hadasek K, Kaba Y, Kuchikawa A, et al. Ann Transl Med. 2019 Jun;7(1):9 |                                                                                                                          |                                                                                                        |
| 30 | Matsuda   | Japan          | Ann Transl Med                 | 2019 | Prospective   | Video-assisted thoracoscopic segmentectomy            | 149                                                  | ICG | 0.25 mg/kg                                                                        | IV                                                                           | After division of the target arteries and bronchus                                   | Karl Storz                                                | NA | Visualize segmental boundaries                                             | 98% (146 patients)                                                               | NA                                                                                                                                | None; 5-year overall and recurrence-free survival rates were 91.8% and 98%, respectively                                                                                    | None                              | NA   | NA                                                                     | Matsuda T, Takahashi Y, Nakada T, Matsushita H, Oya Y, Sakakura N, et al. J Surg Res. 2020 Dec;176:19-24                 |                                                                                                        |
| 31 | Matsui    | Japan          | J Surg Res                     | 2020 | Prospective   | Thoracoscopic anatomical segmentectomy                | 106                                                  | ICG | NA                                                                                | Not reported                                                                 | Not stated                                                                           | Not stated                                                | NA | Identify the intersegmental boundary                                       | 100%                                                                             | NA                                                                                                                                | None reported                                                                                                                                                               | None                              | NA   | NA                                                                     | Matsui T, Takahashi Y, Nakada T, Matsushita H, Oya Y, Sakakura N, et al. J Surg Res. 2020 Dec;176:19-24                  |                                                                                                        |
| 32 | Yazawa    | Japan          | Multimed Man Cardiothorac Surg | 2020 | Case report   | Dorsal segmentectomy of right upper lobe              | 1                                                    | ICG | 0.3 mg/kg in 10 mL                                                                | IV                                                                           | After division of the artery, vein, and bronchus                                     | Not stated in the tutorial (perhaps visible in the video) | NA | Identify the intersegmental plane                                          | 100% success rate                                                                | NA                                                                                                                                | None reported                                                                                                                                                               | None                              | NA   | NA                                                                     | Yazawa T, Igarashi H, Matsumura N, Ohno T, Furusawa S, Kamiyoshima M. Multimed Man Cardiothorac Surg. 2020 Nov;1:780     |                                                                                                        |
| 33 | Yamagita  | Japan          | Surg Case Rep                  | 2020 | Case report   | Extended segmentectomy                                | 1                                                    | ICG | NA                                                                                | IV                                                                           | After dissecting the target structures                                               | Not stated                                                | NA | Identify the intersegmental plane                                          | 100% success rate                                                                | NA                                                                                                                                | None                                                                                                                                                                        | None                              | NA   | NA                                                                     | Yamagita M, Higama N, Matsumoto J. Surg Case Rep. 2020 Oct 27;6(1):273                                                   |                                                                                                        |
| 34 | Matsuda   | Japan          | Gen Thorac Cardiovasc Surg     | 2020 | Case series   | Pulmonary segmentectomy                               | 3                                                    | ICG | 0.25 mg/kg                                                                        | IV                                                                           | After ligation of the blood vessels                                                  | VISERA ELITE II or Karl Storz                             | NA | Identification of aberrant arteries, draining veins, and resection margins | 100% success rate                                                                | NA                                                                                                                                | None                                                                                                                                                                        | None                              | NA   | NA                                                                     | NA                                                                                                                       | Hamada K, Shimizu K, Gen Thorac Cardiovasc Surg. 2020 Oct 19                                           |
| 35 | Liu       | China          | J Cardiothorac Surg            | 2020 | Retrospective | Video-assisted thoracoscopic segmentectomy            | 92                                                   | ICG | 2.5 mg/mL for 6-10 mL                                                             | IV                                                                           | After ligation of the artery, bronchus, and vein                                     | PINPOINT                                                  | NA | Visualize the intersegmental plane                                         | 91% success rate                                                                 | ICG did not change the operative course (stated specifically)                                                                     | In comparison with a group that received the inflation-deflation method but not ICG, the patients who received ICG had fewer cases of air leakage but longer hospital stays | None                              | NA   | NA                                                                     | Liu Z, Yang R, Cao H, J Cardiothorac Surg. 2020 Oct 15;15(1):301                                                         |                                                                                                        |
| 36 | Yamagita  | Japan          | J Cardiothorac Surg            | 2020 | Case report   | Video-assisted left apicoposterior segmentectomy      | 1                                                    | ICG | NA                                                                                | IV                                                                           | After cutting the arteries and bronchus                                              | Not stated                                                | NA | Identify the intersegmental plane                                          | 100% success rate                                                                | NA                                                                                                                                | NA                                                                                                                                                                          | None                              | NA   | NA                                                                     | Yamagita M, Yamaguchi H, Higama N, Matsumoto J. J Cardiothorac Surg. 2020 Sep;25(1):1275                                 |                                                                                                        |
| 37 | Fujii     | Japan          | J Thorac Dis                   | 2020 | Prospective   | Pulmonary segmentectomy                               | 10                                                   | ICG | 5 mL (12.5mg)                                                                     | ICG was mixed with autogenous blood and sprayed through the resected bronchi | After separating the artery, vein, and bronchi                                       | PDE camera (Fluomina)                                     | NA | Identify the intersegmental plane                                          | 80% failed in 2 patients with severe emphysema                                   | NA                                                                                                                                | ICG did not affect the pathological diagnosis                                                                                                                               | 2 patients died of other diseases | None | NA                                                                     | NA                                                                                                                       | Fujii K, Kawase A, Shimizu K, Sekizawa K, Yamashita T, Shibuya N, J Thorac Dis. 2020 Sep;12(9):417-424 |
| 38 | Motobachi | Japan          | Gen Thorac Cardiovasc Surg     | 2020 | Case report   | Video-assisted thoracoscopic left basal segmentectomy | 1                                                    | ICG | 0.1 mg/kg                                                                         | IV                                                                           | After division of the pulmonary artery and vein                                      | Not stated                                                | NA | Identify the perfusion area and abnormal blood flow from aberrant arteries | 100% success rate                                                                | NA                                                                                                                                | NA                                                                                                                                                                          | None                              | NA   | NA                                                                     | NA                                                                                                                       | Wada H, Yamamoto T, Morimoto I, Sakurai Y, Suzuki H, Nakajima T, et al. Ann Thorac Surg. 2020 Aug 14   |
| 39 | Wada      | Japan          | Ann Thorac Surg                | 2020 | Prospective   | Pulmonary segmentectomy                               | 15                                                   | ICG | 0.125 mg/mL (at the ratio of 0.08 or 0.08 according to volumes of target bronchi) | Injection into the target bronchi                                            | After intubation                                                                     | PINPOINT                                                  | NA | 100% success rate                                                          | 81% NA                                                                           | 1 patient experienced recurrent air leakage                                                                                       | None                                                                                                                                                                        | NA                                | NA   | NA                                                                     | Wada H, Yamamoto T, Morimoto I, Sakurai Y, Suzuki H, Nakajima T, et al. Ann Thorac Surg. 2020 Aug 14                     |                                                                                                        |

NA, Not available or not assessed
